1 **Knowledge and perceptions of uterine fibroids: A descriptive cross-sectional survey**  
2 **among women of childbearing age in KwaZulu-Natal, South Africa**

3 Amanda Dlamini<sup>1</sup>, Celenkosini Thembelenkosini Nxumalo<sup>2</sup>, Nomakhosi Mpfana<sup>3</sup>, Michael  
4 Paulse<sup>4</sup>, Mokgadi Makgobole<sup>3</sup>, Pavitra Pillay<sup>1\*</sup>.

5

6 1. Department of Biomedical and Clinical Technology, Faculty of Health Sciences,  
7 Durban University of Technology, Durban, 4000, South Africa Email:  
8 [dlaminiamanda66@gmail.com](mailto:dlaminiamanda66@gmail.com) (AD); [pillayp@dut.ac.za](mailto:pillayp@dut.ac.za) (PP)

9 2. Academic development Unit, Faculty of Health Sciences, Durban University of  
10 Technology, Durban 4000, South Africa: [celenkosinin@dut.ac.za](mailto:celenkosinin@dut.ac.za)

11 3. Department of Somatology, Faculty of Health Sciences, Durban University of  
12 Technology, Durban, South Africa. Email: [nomakhosim@dut.ac.za](mailto:nomakhosim@dut.ac.za) (NM)  
13 [mokgadim@dut.ac.za](mailto:mokgadim@dut.ac.za) (MM)

14 4. Cape Peninsula University of Technology, Faculty of Health and Wellness Sciences,  
15 Cape Town, 8000, South Africa Email: [paulsemi@cput.ac.za](mailto:paulsemi@cput.ac.za)

16

17 \*Author with correspondence: Pavitra Pillay [pillayp@dut.ac.za](mailto:pillayp@dut.ac.za) +27844660916

18

19

20

21

22

NOTE: This preprint reports new research that has not been certified by peer review and should not be used to guide clinical practice.

## 23 **Abstract**

### 24 **Background**

25 Uterine fibroids are the leading cause of hysterectomies among women of childbearing age. This study  
26 aims to elicit the knowledge, attitude and perceptions of childbearing women towards uterine fibroids  
27 in order to provide empirical evidence informing relevant interventions oriented toward health  
28 promotion in this regard.

### 29 **Methods**

30 A quantitative, cross-sectional descriptive design was used and data were collected from a sample of  
31 362 women of reproductive age residing in a selected township in KwaZulu-Natal, South Africa. Ethical  
32 approval to conduct the study was obtained from the Durban University of Technology's Institutional  
33 Research Ethics' Committee (IREC – Ref No. BIREC 014/21). A pre-tested survey was conducted to  
34 gather data on knowledge, attitudes, and perceptions concerning uterine fibroids. The collected data  
35 were analyzed using SPSS version 27, employing descriptive statistics. Inferential statistics were also  
36 conducted to examine associations between key variables and respondents who self-reported being  
37 diagnosed with uterine fibroids.

### 38 **Results**

39 Most participants, 73.8% (n=267), had no awareness of uterine fibroids. Participants also demonstrated  
40 poor knowledge regarding the aetiology and symptoms of the condition. However, most participants,  
41 49.2% (n=178), perceived uterine fibroids to be of spiritual origin, citing evil spirits and witchcraft as  
42 the cause. Participants subsequently reported that treatment would require herbal approaches and  
43 consultation with spiritualists such as traditional healers and seers. In summary, the study highlights  
44 various factors influencing self-reporting behaviours, including age, education level, employment  
45 status, marital status, number of children, awareness of the condition, perception of requiring treatment,  
46 family history, and symptom severity.

47 **Discussion and conclusion**

48 The study findings seem to suggest that women in the selected township lack accurate knowledge about  
49 uterine fibroids. These insights are valuable for shaping targeted health interventions and policies.  
50 Recognizing the complexities of self-reporting is crucial for improving health outcomes through early  
51 detection and tailored interventions.

52

53 **Key words:** Childbearing women, pelvic tumors, reproductive health, uterine fibroids

54

55 **Short Title:** Knowledge and perceptions of uterine fibroids

56

57

58

59

60

61

62

63

64

65

## 66 **Introduction**

67 Uterine fibroids are benign, smooth muscle growths of the uterus that are the most common  
68 forms of pelvic tumours among women (1). While the aetiology of fibroids remains relatively  
69 unknown, it is stated that the combination of hormonal and genetic factors are determinants of  
70 facilitative and synergistic factors that are influential in their growth (2, 3, 4). Although fibroids  
71 are often benign, they possess a combination of smooth muscle and fibroblastic components  
72 with a substantial presence of fibrous extracellular matrix which precipitates the pathogenic  
73 process (5). The location and size of fibroids in the uterus are important determinants of  
74 symptomatology and clinical manifestations (6). Nulliparity, race, obesity and familial history  
75 are common predisposing factors to clinically significant fibroids (2, 7, 8). The growth of  
76 uterine fibroids may be intramural, submucosal and sub-serosal (9). Uterine fibroids that are  
77 most common and often benign, grow intramurally, while the submucosal fibroids are least  
78 common and are often clinically significant (10).

79 Epidemiological data on uterine fibroids suggest that uterine fibroids occur in more than 70%  
80 of women at the onset of menopause (11, 12). Furthermore, research shows a higher incidence  
81 rate among Black women of African descent (2, 13). While the exact population incidence of  
82 uterine fibroids remains relatively unclear, there is substantial observational evidence  
83 indicating a higher incidence and prevalence rate among black women as compared to other  
84 races (14). The health outcomes and related complications owing to the occurrence of uterine  
85 fibroids is further exacerbated by socio-economic issues of level of education, employment and  
86 individual perceptual factors (15).

87 The clinical manifestations and symptoms of uterine fibroids vary, depending on the clinical  
88 significance. It is estimated that just under 50% of cases are often asymptomatic, (16) while  
89 the remaining cases often have symptoms ranging from mild to severe abdominal discomfort,

90 acute pelvic pain, abnormal uterine bleeding, with variable amounts of bleeding depending on  
91 the size and location of the fibroid (17). Additional clinical features include frequency of  
92 micturition, swelling of the abdomen and increased pelvic pressure (18). Uterine fibroids may  
93 also result in complications leading to infertility, miscarriages, premature labour and  
94 complications related to prolonged uterine bleeding (19, 20). Child-bearing, pregnant women  
95 with uterine fibroids are also at higher risk of post-partum haemorrhage during labour and  
96 delivery (21, 22).

97 While treatment of fibroids depends on the size, location and nature of clinical symptoms (23,  
98 24, 25), the use of oral contraceptives has been proven to be effective in providing some degree  
99 of protection against the development of uterine fibroids (26, 27, 28). The success of curative  
100 approaches for clinically significant fibroids depends on patient-related and health service-  
101 related factors among the many determinants. In the instances of benign asymptomatic factors,  
102 patient and health system factors may also be said to be influential in determining the course  
103 and health outcomes related to the presence of such types of fibroids. In both of the  
104 aforementioned instances, the patient as the key determining factor cannot be understated. The  
105 notion of the patient as a critical determining factor relates to an accurate, comprehensive and  
106 holistic understanding and awareness regarding uterine fibroids (29). This means that  
107 awareness, knowledge, attitudes and perceptions extend beyond mere recognition of signs and  
108 symptoms but also encompass an understanding of the nature and origins of fibroids, coupled  
109 with appropriate behaviour change interventions that relate to prevention and health seeking  
110 behaviour in order to attain relevant treatment as necessitated by clinical significance.

111 Since reproductive and general health outcomes related to the presence of fibroids are  
112 dependent on individual patient factors of knowledge, attitudes and perceptions, an awareness  
113 of these factors is essential among women of reproductive age so that uptake of relevant health  
114 seeking interventions may be facilitated in order to initiate appropriate treatment and reverse

115 potential complications. While the knowledge, awareness and perceptions of women regarding  
116 uterine fibroids has been assessed and explored globally (30, 31, 32), there is a paucity of such  
117 data among women of reproductive age, particularly in sub-Saharan Africa, more specifically,  
118 in South Africa. Moreover, there is a dearth of context specific research, meaning that  
119 contextual and evidence-informed education interventions related to fibroids remain  
120 suboptimal for women of reproductive age. The aim of this study was thus to assess the  
121 knowledge, attitudes and perceptions towards uterine fibroids among women of childbearing  
122 age in rural KwaZulu-Natal, South Africa, to facilitate contextual awareness regarding existing  
123 knowledge, attitudes and perceptions concerning uterine fibroids. These findings subsequently  
124 have implications for informing educational interventions to facilitate awareness regarding  
125 uterine fibroids. Ghant et al (2016)(31) argue that there is a need for patient-centred and  
126 community-based interventions to improve women's knowledge regarding uterine fibroids so  
127 that relevant treatment options may be promoted. It is postulated that awareness may result in  
128 positive health-seeking behaviour related to prevention and treatment of fibroids. This may  
129 subsequently have positive outcomes on quality of life and public health, because fibroids are  
130 the leading cause of high rates of total hysterectomies among childbearing women (33).

## 131 **Materials and Methods**

132 This study employed a quantitative, cross-sectional descriptive design to assess the knowledge,  
133 attitudes and perceptions of childbearing women aged 18 to 35 towards uterine fibroids in a  
134 township in KwaZulu-Natal, South Africa. Data were collected between 19 July to 30 October  
135 2021. Non-probability convenience sampling was used to recruit participants for the study.  
136 Three hundred and sixty-two ( $N = 362$ ) childbearing women were enrolled in the study based  
137 on the sample size calculated using the G\*Power software version 3.1.9.7 (34).

138 This is line with suggestions made by various statistical scholars: Cohen (1992) suggests that  
139 a priori sample size determination is necessary for sufficient power in chi-squared tests and  
140 statistical power analysis is essential to guarantee that studies can detect effects (35). The non-  
141 centrality parameter affects these tests' power and needed sample size, reflecting the expected  
142 test statistic in the event of an alternate hypothesis (36). Standard large-sample formulas can  
143 approximate power, sample size and the smallest detectable effect (37); conventional effect  
144 size values and their corresponding sample sizes for achieving a power of 0.80 offer guidelines  
145 (38). To prevent underpowered studies, effect size estimates from prior research should take  
146 uncertainty into account (39). Considering all of this, G\*Power yielded a minimal acceptable  
147 size of 32 to 55 for degrees of freedom,  $df$ , ranging from 1 to 6 respectively for a large effect  
148 size,  $w = 0.50$ ,  $\alpha$  err prob = 0.05, power (1- $\beta$ ) err prob = 0.80 which is substantially lower than  
149 what was finally sampled.

150 Childbearing women were recruited to participate in the study at community level through  
151 using random selection, based on convenience sampling approaches applied at the primary  
152 researcher's discretion. A structured, pre-tested interviewer-administered questionnaire was  
153 used to collect data from participants. The structured questionnaire comprised questions to  
154 elicit demographic details of participants such as age, level of education, occupation and  
155 marital status. Specific questions of knowledge and awareness related to signs, symptoms, risk  
156 factors and complications of uterine fibroids were also detailed in the questionnaire.

157 The data collected were entered on to Microsoft Excel and analysed using Statistical Product  
158 and Service Solutions version (SPSS), version 27. Initially, exploratory descriptive statistics  
159 were conducted to analyze the frequencies of various categories, behaviours, attitudes, and  
160 medical conditions among participants. This step provided a comprehensive overview of the  
161 distribution of variables in the dataset, allowing researchers to identify patterns and trends.

162 Following the exploratory descriptive analysis, chi-squared tests were employed to investigate  
163 associations between these variables and participants' self-reporting of a diagnosis of uterine  
164 fibroids. chi-squared tests are commonly used for analyzing categorical data and determining  
165 whether there is a significant association between variables (40). They assess whether the  
166 observed frequencies in different categories deviate significantly from what would be expected  
167 by chance (41). In this study, chi-squared tests were chosen due to their ability to handle  
168 categorical data and their non-parametric nature, making them suitable for analyzing variables  
169 with non-normal distributions (42, 43). The results of the chi-squared tests provided insights  
170 into the relationships between various factors and participants' likelihood of self-reporting a  
171 diagnosis of uterine fibroids.

172 However, it's important to note that while chi-squared tests are widely used, they have  
173 limitations, particularly in cases where sample sizes are small or when the assumptions of the  
174 test are violated (44, 45, 46). In instances where the expected frequencies are low, the Fisher's  
175 exact test may be more appropriate as it provides more accurate results (47, 48, 49). Despite  
176 this, the initial exploratory descriptive statistics provided valuable context for the subsequent  
177 chi-squared analyses, enhancing the overall understanding of the relationships between  
178 variables in the study.

## 179 **Ethical Approval and Considerations**

180 The study was conducted in accordance with the Declaration of Helsinki, and approved by the  
181 Durban University of Technology's Institutional Research Ethics' Committee (BIREC  
182 014/21). A written informed consent was obtained from all participants prior to data collection  
183 and all ethical principles of research were observed when conducting the study.



184 **Results**

185 Participant Demographics

186 Table 1 presents the demographic characteristics of the participants involved in the study on  
187 knowledge and perceptions of uterine fibroids among women of childbearing age in KwaZulu-  
188 Natal, South Africa.

189 **Table 1. Participant Demographics**

| <b>Characteristics</b>           | <b>Frequency<br/>(N)</b> | <b>Percentage<br/>(%)</b> |
|----------------------------------|--------------------------|---------------------------|
| <b><i>Age</i></b>                |                          |                           |
| 18-25                            | 227                      | 62.7                      |
| 26-31                            | 30                       | 8.3                       |
| 32-40                            | 105                      | 29                        |
| <b><i>Level of Education</i></b> |                          |                           |
| Illiterate                       | 8                        | 2.2                       |
| Primary School Education         | 6                        | 1.7                       |
| Read and write                   | 5                        | 1.4                       |
| Secondary School Education       | 69                       | 19.1                      |
| Tertiary Education               | 274                      | 75.7                      |
| <b><i>Marital status</i></b>     |                          |                           |
| Divorced                         | 16                       | 4.4                       |
| Married                          | 69                       | 19.1                      |
| Single                           | 254                      | 70.2                      |
| Widowed                          | 23                       | 6.4                       |
| <b><i>Occupation</i></b>         |                          |                           |
| Unemployed                       | 295                      | 81.5                      |
| Employed                         | 67                       | 18.5                      |
| TOTAL                            | 362                      | 100                       |

190

191

## 192 **Age**

193 Participants were categorized into three age groups: 18-25, 26-31, and 32-40 years. The  
194 majority of participants fell within the age range of 18-25 years (62.7%), followed by 32-40  
195 years (29.0%), and 26-31 years (8.3%).

## 196 **Level of Education**

197 Participants' educational attainment varied, with the majority having tertiary education  
198 (75.7%). A smaller proportion had secondary education (19.1%), while a very small percentage  
199 had either primary education (1.7%) or could only read and write (1.4%). A minority reported  
200 being illiterate (2.2%).

## 201 **Marital Status**

202 Participants' marital status was diverse, with the majority being single (70.2%). Married  
203 women made up (19.1%) of the sample, while smaller percentages were either widowed (6.4%)  
204 or divorced (4.4%).

## 205 **Occupation**

206 The majority of participants reported being unemployed (81.5%), while a smaller proportion  
207 were employed (18.5%).

208 These demographic characteristics provide insight into the composition of the participant  
209 sample in terms of age, education, marital status, and occupation, which is crucial for  
210 understanding the population under study and interpreting the findings of the research  
211 accurately

212 In addition, the study explored associations between participant demographics, perceptions,  
213 lifestyles, and self-reported diagnosis of uterine fibroids were examined. It is important to note  
214 that associations do not necessarily imply causation but allow for future research exploration  
215 (40, 50, 51, 52). Table 2 displays the association between various categories of interest and

216 participants' self-reported diagnosis of uterine fibroids, along with the chi-square statistics for  
217 each category. The analysis reflects the following:

### 218 **Age Group**

219 A significant association was found between age group and self-reported diagnosis of uterine  
220 fibroids ( $\chi^2 = 42.979$ ,  $df = 2$ ,  $p < .001$ ). Specifically, within the 26-31 age group, there were  
221 significantly more self-reported diagnoses compared to the other age groups.

### 222 **Education Level**

223 Participants' education levels were classified as primary, secondary, or tertiary. The analysis  
224 revealed no significant association between education level and self-reported diagnosis of  
225 uterine fibroids ( $\chi^2 = 0.254$ ,  $df = 2$ ,  $p = 0.881$ ).

### 226 **Employment Status**

227 Participants were categorized as unemployed or working. Employment status showed a  
228 significant association with self-reported diagnosis of uterine fibroids ( $\chi^2 = 12.605$ ,  $df = 1$ ,  $p <$   
229  $.001$ ). A higher proportion of working participants reported a diagnosis compared to  
230 unemployed participants.

### 231 **Marital Status**

232 Marital status was classified as single, married, divorced, or widowed. A significant association  
233 was found between marital status and self-reported diagnosis of uterine fibroids ( $\chi^2 = 53.667$ ,  
234  $df = 3$ ,  $p < .001$ ). Specifically, married participants were more likely to report a diagnosis  
235 compared to participants in other marital status categories.

### 236 **Normal Menstrual Cycle**

237 Participants were asked about the regularity of their menstrual cycles. There was a significant  
238 association between having a normal menstrual cycle and self-reported diagnosis of uterine

239 fibroids ( $\chi^2 = 15.321$ ,  $df = 1$ ,  $p < .001$ ). Participants with a normal menstrual cycle were more  
240 likely to report a diagnosis.

### 241 **Heavy Periods**

242 Participants were asked whether they experienced heavy periods. Heavy periods showed a  
243 significant association with self-reported diagnosis of uterine fibroids ( $\chi^2 = 875.337$ ,  $df = 1$ ,  $p$   
244  $< .001$ ). Participants experiencing heavy periods were overwhelmingly more likely to report a  
245 diagnosis.

### 246 **Children**

247 The number of children participants had was categorized as none, one, two to three, or four.  
248 There was a significant association between the number of children and self-reported diagnosis  
249 of uterine fibroids ( $\chi^2 = 110.930$ ,  $df = 3$ ,  $p < .001$ ). Participants with four children reported the  
250 highest proportion of diagnoses.

### 251 **Gynaecological Visits**

252 Participants' frequency of gynaecological visits was categorized as never, once, twice, or more  
253 than twice. A significant association was found between the frequency of gynaecological visits  
254 and self-reported diagnosis of uterine fibroids ( $\chi^2 = 77.107$ ,  $df = 3$ ,  $p < .001$ ). Participants who  
255 visited a gynaecologist more than twice were more likely to report a diagnosis.

### 256 **Reasons for Gynaecological Visits**

257 Various reasons for gynaecological visits were explored. A significant association was found  
258 between the reason for visits and self-reported diagnosis of uterine fibroids ( $\chi^2 = 82.770$ ,  $df =$   
259  $6$ ,  $p < .001$ ). Particularly, visits due to abnormal uterine bleeding and painful periods were  
260 strongly associated with reporting a diagnosis.

## 261 **Awareness of Uterine Fibroids**

262 Participants were asked if they had heard about uterine fibroids. There was a significant  
263 association between awareness of uterine fibroids and self-reported diagnosis ( $\chi^2 = 71.132$ ,  $df$   
264  $= 1$ ,  $p < .001$ ). Participants who had heard about uterine fibroids were more likely to report a  
265 diagnosis.

## 266 **Perceived Need for Treatment**

267 Participants were asked if they perceived a need for treatment for uterine fibroids. There was a  
268 significant association between perceived need for treatment and self-reported diagnosis ( $\chi^2 =$   
269  $22.144$ ,  $df = 2$ ,  $p < .010$ ). Participants who reported a diagnosis were more likely to perceive a  
270 need for treatment.

## 271 **Family History**

272 Participants were asked about a family history of uterine fibroids. A significant association was  
273 found between family history and self-reported diagnosis ( $\chi^2 = 146.331$ ,  $df = 2$ ,  $p < .001$ ).  
274 Participants with a family history of uterine fibroids were more likely to report a diagnosis.

## 275 **Symptoms Score**

276 Participants' symptom scores were categorized into six groups. There was a significant  
277 association between symptom score and self-reported diagnosis ( $\chi^2 = 33.019$ ,  $df = 5$ ,  $p < .001$ ).  
278 Participants with higher symptom scores were more likely to report a diagnosis of uterine  
279 fibroids.

280 These findings highlight the importance of demographic factors, health behaviours, and  
281 symptomatology in the diagnosis and perception of uterine fibroids among women of  
282 childbearing age in KwaZulu-Natal, South Africa.

283 **Table 2 Association of Categories of Interest and the Participants' Self-Reported**  
 284 **Diagnosis**

|                                      | <b>Diagnosed</b> |            |              | <b>Chi-squared Statistics</b> |           |                |
|--------------------------------------|------------------|------------|--------------|-------------------------------|-----------|----------------|
|                                      | <b>No</b>        | <b>Yes</b> | <b>Total</b> | <b>X<sup>2</sup></b>          | <b>df</b> | <b>p-Value</b> |
| <b><i>Age Group</i></b>              |                  |            |              |                               |           |                |
| 18-25                                | 204              | 3          | 207          | 42.979                        | 2         | < .001         |
| 26-31                                | 26               | 2          | 28           |                               |           |                |
| 32-40                                | 73               | 23         | 96           |                               |           |                |
| Total                                | 303              | 28         | 331          |                               |           |                |
| <b><i>Education Level</i></b>        |                  |            |              |                               |           |                |
| Primary                              | 15               | 2          | 17           | 0.254                         | 2         | 0.881          |
| Secondary                            | 56               | 5          | 61           |                               |           |                |
| Tertiary                             | 232              | 21         | 253          |                               |           |                |
| Total                                | 303              | 28         | 331          |                               |           |                |
| <b><i>Employment Status</i></b>      |                  |            |              |                               |           |                |
| Unemployed                           | 255              | 16         | 271          | 12.605                        | 1         | < .001         |
| Working                              | 48               | 12         | 60           |                               |           |                |
| Total                                | 303              | 28         | 331          |                               |           |                |
| <b><i>Marital Status</i></b>         |                  |            |              |                               |           |                |
| Single                               | 227              | 4          | 231          | 53.667                        | 3         | < .001         |
| Married                              | 49               | 16         | 65           |                               |           |                |
| Divorced                             | 14               | 1          | 15           |                               |           |                |
| Widowed                              | 13               | 7          | 20           |                               |           |                |
| Total                                | 303              | 28         | 331          |                               |           |                |
| <b><i>Normal Menstrual Cycle</i></b> |                  |            |              |                               |           |                |
| No                                   | 284              | 10         | 294          | 15.321                        | 1         | < .001         |
| Yes                                  | 15               | 18         | 33           |                               |           |                |
| Total                                | 299              | 28         | 327          |                               |           |                |
| <b><i>Heavy Periods</i></b>          |                  |            |              |                               |           |                |
| No                                   | 202              | 5          | 207          | 875.337                       | 1         | < .001         |
| Yes                                  | 101              | 23         | 124          |                               |           |                |
| Total                                | 303              | 28         | 331          |                               |           |                |
| <b><i>Children</i></b>               |                  |            |              |                               |           |                |
| None                                 | 236              | 8          | 244          | 110.93                        | 3         | < .001         |
| One                                  | 45               | 4          | 49           |                               |           |                |
| Two - Three                          | 18               | 3          | 21           |                               |           |                |
| Four                                 | 4                | 13         | 17           |                               |           |                |
| Total                                | 303              | 28         | 331          |                               |           |                |
| <b><i>Gynae Visits</i></b>           |                  |            |              |                               |           |                |
| Never                                | 246              | 3          | 249          |                               |           |                |

|                                            |     |    |     |         |   |        |
|--------------------------------------------|-----|----|-----|---------|---|--------|
| Once                                       | 28  | 8  | 36  | 77.107  | 3 | < .001 |
| Twice                                      | 7   | 2  | 9   |         |   |        |
| More than two                              | 22  | 15 | 37  |         |   |        |
| Total                                      | 303 | 28 | 331 |         |   |        |
| <b>Reasons for Gynae Visits</b>            |     |    |     |         |   |        |
| Abnormal uterine bleeding, Painful periods | 85  | 7  | 92  |         |   |        |
| Fibriods & Cysts                           | 2   | 3  | 5   | 82.77   | 6 | < .001 |
| Genital warts                              | 1   | 0  | 1   |         |   |        |
| Infertility                                | 10  | 5  | 15  |         |   |        |
| Pregnancy                                  | 2   | 0  | 2   |         |   |        |
| UTI                                        | 20  | 12 | 32  |         |   |        |
| None                                       | 180 | 0  | 180 |         |   |        |
| Total                                      | 300 | 27 | 327 |         |   |        |
| <b>Heard About the UF</b>                  |     |    |     |         |   |        |
| No                                         | 243 | 2  | 245 |         |   |        |
| Yes                                        | 60  | 26 | 86  | 71.132  | 1 | < .001 |
| Total                                      | 303 | 28 | 331 |         |   |        |
| <b>Requires Treatment</b>                  |     |    |     |         |   |        |
| Yes                                        | 11  | 0  | 11  |         |   |        |
| No                                         | 164 | 28 | 192 | 22.144  | 2 | < .010 |
| Uncertain                                  | 128 | 0  | 128 |         |   |        |
| Total                                      | 303 | 28 | 331 |         |   |        |
| <b>Family History</b>                      |     |    |     |         |   |        |
| No                                         | 284 | 10 | 294 |         |   |        |
| Yes                                        | 15  | 18 | 33  | 146.331 | 2 | < .001 |
| Total                                      | 299 | 28 | 327 |         |   |        |
| <b>Symptoms Score</b>                      |     |    |     |         |   |        |
| 8 – 17                                     | 38  | 2  | 40  |         |   |        |
| 18 – 22                                    | 54  | 0  | 54  | 33.019  | 5 | < .001 |
| 23 – 27                                    | 75  | 0  | 75  |         |   |        |
| 28 – 32                                    | 40  | 3  | 43  |         |   |        |
| 33 – 37                                    | 21  | 3  | 24  |         |   |        |
| 38 +                                       | 74  | 20 | 94  |         |   |        |
| Total                                      | 302 | 28 | 330 |         |   |        |

285

286

287 **Knowledge of uterine fibroids**

288 To elicit participants' knowledge about uterine fibroids, open- and closed-ended questions  
289 were posed concerning awareness, causes and definition of uterine fibroids. Table 3 shows that  
290 regarding awareness of uterine fibroids, most participants, 76% (n=276), indicated that they  
291 had never heard of uterine fibroids.

292

293 **Table 3. Knowledge of Uterine Fibroids**

| <b>Knowledge</b>                                             | <b>Frequency</b> | <b>Percentage (%)</b> |
|--------------------------------------------------------------|------------------|-----------------------|
| <b>Awareness of uterine fibroids</b>                         | <b>237</b>       | <b>65.5</b>           |
| <i>Valid knowledge about the causes of uterine fibroids:</i> |                  |                       |
| (1) Hormonal Imbalances                                      | (1) 24           | (1) 6.6               |
| (2) Lifestyle factors                                        | (2) 30           | (2) 8.3               |
| (3) Hereditary factors                                       | (3) 8            | (3) 2.2               |
| (4) Early menarche                                           | (4) 15           | (4) 4.1               |

294

295 This finding was subsequently confirmed by the results of the binominal test which was  
296 conducted as a follow-up, highlighting that this finding was statistically significant. When  
297 asked about the causes of uterine fibroids, 65. 5% (n=237) did not provide a response, while  
298 an additional 7.7% (n= 28) provided an invalid response. The remaining participants provided  
299 valid responses, citing various answers to this question, as 6.6% (n=24) revealed that uterine  
300 fibroids are caused by hormonal imbalances; 8.3 % (n=30) cited lifestyle factors such as  
301 obesity, high stress levels and multiple sexual partners as a cause. A further 2.2% (n=8) cited  
302 hereditary factors, while 4.1% (n=15) stated that uterine fibroids result from the onset of early  
303 menarche. Another 0.8% (n=3) of the participants stated that uterine fibroids are caused by evil  
304 spirits. To ascertain knowledge of uterine fibroids by definition, participants were asked an  
305 open-ended question which yielded responses that were categorised into different subgroups.



306 Only 14,9% of the participants (n=54) responded to the aforementioned question and defined  
307 uterine fibroids as a type of cancer.

308

### 309 **Perceptions of uterine fibroids**

310 To elicit responses of perceptions related to uterine fibroids, participants were asked questions  
311 related to the perceived age group that is normally affected; the treatment approaches that are  
312 most effective or suitable, and perceptions regarding the origin of uterine fibroids. Table 4  
313 highlights participants responses regarding the perceived age group that is normally affected  
314 by uterine fibroids, 24.9%(n=90) indicated that uterine fibroids occur in females of ten (10)  
315 years and older, whereas 8.3% (n=30) revealed that uterine fibroids affect any age group. The  
316 remaining participants, 62,7% (n=227), did not provide a response to this question.

317

318 **Table 4. Perceptions of uterine fibroids**

| <b>Perception</b>                                            | <b>Frequency</b> | <b>Percentage (%)</b> |
|--------------------------------------------------------------|------------------|-----------------------|
| Uterine fibroids affect females >10 years                    | 90               | 24.9                  |
| Uterine fibroids affect females in any age group             | 30               | 8.3                   |
| Uterine fibroids require treatment interventions             | 200              | 55                    |
| Uterine fibroids require spiritual treatment                 | 178              | 49.2                  |
| Uterine fibroids require medical treatment                   | 31               | 8.6                   |
| Uterine fibroids require traditional and/or herbal treatment | 153              | 42.3                  |

319

320 About 55% of the participants (n=200) agreed that uterine fibroids require treatment and 3.3%  
321 (n=12) stated that they did not require treatment. Of the participants, 49.2% (n=178) indicated  
322 that spiritual treatment (prayer) is required to manage uterine fibroids, while 42.3% (n=153)  
323 stated that herbal remedies were required to cure uterine fibroids. Only 8.6% (n=31) of the  
324 participants believed that medical treatment was required.

## 325 **Discussion**

326 This study assessed the knowledge, attitudes and perceptions of childbearing women regarding  
327 uterine fibroids in KwaZulu-Natal, South Africa. The study findings revealed that the majority  
328 of participants in this study had never heard of uterine fibroids, implying a lack of adequate  
329 knowledge among these participants. This finding concurs with previous studies (53, 54) where  
330 low levels of knowledge were also observed among women, including those with reasonably  
331 acceptable levels of education. A lack of knowledge concerning uterine fibroids was noted,  
332 since the majority of participants indicated that these are cancerous growths and painful  
333 periods, while few participants displayed an awareness that these are non-cancerous. The  
334 reported misconceptions corroborate the study conducted by Saghir, Kamran (55) which  
335 indicated that participants incorrectly define uterine fibroids (ufs). In this study, the majority  
336 of participants perceived the common age occurrence of ufs to be in the range of 10 years and  
337 older and in any age group, which was not the expected response. This finding contradicts  
338 many studies, including that of Borah, Yao (56) which indicated the common age occurrence  
339 as 18-54. However, Gao and Wang (57) suggested that the common age occurrence is over  
340 35 years .

341 Although the aetiology of uterine fibroids remained elusive, there was an indication of  
342 knowledge of the predisposing factors to uterine fibroids (58). The majority of the participants  
343 showed a correct knowledge of the predisposing factors, which included stress, obesity,  
344 hereditary, early menarche, caffeine, smoking and hormones. This is consistent with the studies  
345 of (59, 60, 61). A few participants indicated that uterine fibroids are caused by having multiple  
346 partners, although a study conducted by Azzahra, Gondodiputro (62) proved that there is no  
347 association between this factor and uterine fibroids. It was also noted that participants indicated

348 that uterine fibroids are caused by evil spirits. This corroborates findings in the study conducted  
349 by Akpenpuun *et al.* (2019).

350 Most participants indicated that uterine fibroids require treatment, while a few said they do not  
351 require treatment. The study conducted by Ciebiera, Ali (64) also indicated similar findings.  
352 Around two-fifths (2/5) of the participants indicated that uterine fibroids are a spiritual  
353 problem and that prayer is used in treating this disease. The study conducted by Wu, Shao (65)  
354 also indicated similar findings. However, these findings contradict the findings of Arisukwu,  
355 Nwogu (66) in which celibate-women, despite their spiritual lifestyle, did not embrace praying  
356 and fasting as options for fibroid prevention. A further two-fifths (2/5) of the participants  
357 indicated that herbal treatment is required for the treatment of uterine fibroids. This is  
358 consistent with the observations of Arisukwu, Nwogu (66) that, regardless of their level of  
359 education, women still opt for local herbs as a form of treatment. The remaining one-fifth (1/5)  
360 of the participants indicated that medical treatment is ideal for uterine fibroids which concurs  
361 with the findings of Millien, Manzi (67).

362 A study conducted by Ikechebelu, Okpala (68) indicated that women with uterine fibroids  
363 frequently experience multiple gynaecological pain symptoms and bleeding symptoms,  
364 compared to women with no uterine fibroids. Riggan, Stewart (69) stated that most women  
365 lack knowledge of uterine fibroids symptoms. The strong correlation across the symptoms  
366 indicates that participants are likely to experience all the symptoms. These findings are  
367 consistent with those observed in the study conducted by Tojjeva, Khalimova (60) and that of  
368 Singh, Shinde (70).

369 It was observed during the analysis, that the majority of the participants in the present study  
370 indicated that they experienced heavy bleeding during menstrual periods. A study conducted  
371 by Naz, Memon (71) indicated that women with uterine fibroids are two (2) to three (3 ) times

372 more likely to experience heavy bleeding during menstrual periods than those who do not have  
373 uterine fibroids. These findings corroborate the study conducted by Fuldeore and Soliman (18).  
374 Anaemia, which is a possible consequence of severe menstrual bleeding, was moderate among  
375 the participants. This was expected, hence heavy menstrual bleeding is one of the hallmark  
376 symptoms of uterine fibroids (69).

377

378 Most participants in this study indicated that they experienced the passing of blood clots during  
379 menstrual periods. This is consistent with the study conducted by Swain, Yadav (72) where  
380 blood clots were reported by women with uterine fibroids. These findings suggest an  
381 association between blood clot passing and uterine fibroids which is supported by the study of  
382 Salas, López (73).

383 Fluctuation in the duration of menstrual periods compared to previous cycles was reported by  
384 the most of the participants in this study and is associated with uterine fibroids. Many studies  
385 are in agreement with this observation that women with uterine fibroids experience fluctuation  
386 in the duration of menstrual periods compared to previous cycles (74, 75). The majority of the  
387 participants indicated that they experienced fluctuation in the length of monthly cycles  
388 compared to previous cycles which is associated with uterine fibroids. This corroborates the  
389 study conducted by Tayebi, Izaddost (74) which also observed fluctuation in the length of  
390 monthly cycles compared to previous cycles in women with uterine fibroids. More than two-  
391 thirds (2/3) of the participants indicated that they experienced pressure in the pelvic area. This  
392 could be the reason why the majority of participants reported sexual dyspareunia (pain during  
393 sexual intercourse) since this is a complication caused by pressure in the pelvic area (76). These  
394 findings are consistent with the findings observed by Xie *et al.* (2020) that women with uterine  
395 fibroids reported pelvic pressure.

396 The present study findings imply that most of the participants experience urinary problems.  
397 This suggests that these problems may be caused by uterine fibroids. The study by Laughlin-  
398 Tommaso, Lu (77) also observed similar findings where participants experienced frequent  
399 urination. Participants reported that they experienced fatigue; which is a symptom associated  
400 with uterine fibroids. Fatigue could also be associated with emotional problems which were  
401 reported by some of the participants (78). These findings corroborate those observed in the  
402 study conducted by Harmon (79).

403 Infertility was reported by a few participants in this study. It is believed that fibroids can result  
404 in infertility due to their location and size (80). There are many studies which indicate that  
405 uterine fibroids are mostly seen in nulliparous women (62, 81), however, it was observed in a  
406 study conducted by Saghir, Kamran (55) that multiparous women also experience uterine  
407 fibroids due to early pregnancy. A few participants reported abortion as a problem, which is  
408 suggestive that this problem might be caused by uterine fibroids. Tran, Al Naber (82) indicated  
409 that that women with uterine fibroids may experience spontaneous abortion according to the  
410 size and location of the fibroids. These findings corroborate those observed in the study  
411 conducted by Fortin, Flyckt (83).

#### 412 **Study Limitations**

413 The study design only included questionnaire data on the knowledge and perceptions of uterine  
414 fibroids, which could not be confirmed with patient medical records. The study was aimed at  
415 women of childbearing age only and did not include the views of medical staff that may be  
416 responsible for managing or treating uterine fibroids. The study also did not consider the  
417 available health care facilities for women at risk to approach should they experience symptoms  
418 of complications related to uterine fibroids.

## 419 **Conclusion**

420 The aim of this study was to assess the knowledge and perceptions regarding uterine fibroids  
421 among women of childbearing age in KwaZulu-Natal, South Africa, to provide contextual  
422 awareness regarding existing knowledge and perceptions on this subject matter. The findings  
423 suggest that women of 18-40 years of age in this study lack knowledge of uterine fibroids,  
424 hence they live chronically with symptoms, without seeking help. It appears that limited  
425 knowledge of uterine fibroids and normal menstruation can lead to a distorted view of what  
426 constitutes normality concerning uterine bleeding. The findings imply that further studies to  
427 investigate individualised and community-based education interventions related to uterine  
428 fibroids are necessary to promote self-preventive interventions, as well as health-seeking  
429 behaviours among women. While there seems to be a more profound focus on other female  
430 health issues such as cervical cancer and breast cancer, knowledge and awareness of uterine  
431 fibroids among communities at risk are also needed as this could help alleviate the related  
432 complications among women of childbearing age in KwaZulu-Natal.

## 433 **Acknowledgments**

434 We would like to thank all the participants for their enthusiastic participation in this study.

## 435 **Data availability**

436 Due to privacy, data are available upon request from the first author.

437

438

439

440

441

## 442 References

- 443 1. Bulun SE. Uterine fibroids. *New England Journal of Medicine*. 2013;369(14):1344-55.
- 444 2. Okolo S. Incidence, aetiology and epidemiology of uterine fibroids. *Best practice & research*  
445 *Clinical obstetrics & gynaecology*. 2008;22(4):571-88.
- 446 3. Quinn M. Uterine innervation in fibroids: a qualitative study. *Journal of Obstetrics and*  
447 *Gynaecology*. 2007;27(5):489-92.
- 448 4. Viner AC, Menezes MQ. An Overview of the Aetiology, Epidemiology, Symptomatology  
449 and Management of Uterine Fibroids. *Current Obstetrics and Gynecology Reports*.  
450 2016;5(2):65-72.
- 451 5. Stewart EA, Laughlin-Tommaso SK, Catherino WH, Lalitkumar S, Gupta D, Vollenhoven  
452 B. Uterine fibroids. *Nature Reviews Disease Primers*. 2016;2(1):16043.
- 453 6. Giuliani E, As-Sanie S, Marsh EE. Epidemiology and management of uterine fibroids.  
454 *International Journal of Gynecology & Obstetrics*. 2020;149(1):3-9.
- 455 7. Flake GP, Andersen J, Dixon D. Etiology and pathogenesis of uterine leiomyomas: a review.  
456 *Environmental health perspectives*. 2003;111(8):1037-54.
- 457 8. Morhason-Bello IO, Adebamowo CA. Epidemiology of uterine fibroid in black African  
458 women: a systematic scoping review. *BMJ open*. 2022;12(8):e052053.
- 459 9. Stewart EA. Uterine fibroids. *The Lancet*. 2001;357(9252):293-8.
- 460 10. Gupta S, Jose J, Manyonda I. Clinical presentation of fibroids. *Best practice & research*  
461 *Clinical obstetrics & gynaecology*. 2008;22(4):615-26.
- 462 11. Stewart E, Cookson C, Gandolfo R, Schulze-Rath R. Epidemiology of uterine fibroids: a  
463 systematic review. *BJOG: An International Journal of Obstetrics & Gynaecology*.  
464 2017;124(10):1501-12.
- 465 12. Sanei-Moghaddam A, Kang C, Edwards RP, Louder PJ, Ismail N, Goughnour SL, et al.  
466 Racial and socioeconomic disparities in hysterectomy route for benign conditions. *Journal of*  
467 *racial and ethnic health disparities*. 2018;5(4):758-65.
- 468 13. Stewart EA, Cookson C, Gandolfo RA, Schulze-Rath R. Epidemiology of uterine fibroids:  
469 a systematic review. *BJOG: An International Journal of Obstetrics & Gynaecology*.  
470 2017;124(10):1501-12.
- 471 14. Giuliani E, As-Sanie S, Marsh EE. Epidemiology and management of uterine fibroids.  
472 *International Journal of Gynecology & Obstetrics*. 2020;149(1):3-9.
- 473 15. Eltoukhi HM, Modi MN, Weston M, Armstrong AY, Stewart EA. The health disparities of  
474 uterine fibroid tumors for African American women: a public health issue. *American journal*  
475 *of obstetrics and gynecology*. 2014;210(3):194-9.
- 476 16. Divakar H. Asymptomatic uterine fibroids. *Best Practice & Research Clinical Obstetrics &*  
477 *Gynaecology*. 2008;22(4):643-54.
- 478 17. Ekine AA, Lawani LO, Iyoke CA, Jeremiah I, Ibrahim IA. Review of the clinical  
479 presentation of uterine fibroid and the effect of therapeutic intervention on fertility. *Am J Clin*  
480 *Med Res*. 2015;3(1):9-13.
- 481 18. Fuldeore MJ, Soliman AM. Patient-reported prevalence and symptomatic burden of uterine  
482 fibroids among women in the United States: findings from a cross-sectional survey analysis.  
483 *Int J Womens Health*. 2017;9:403-11.
- 484 19. Stewart EA. Uterine fibroids. *New England Journal of Medicine*. 2015;372(17):1646-55.
- 485 20. Purohit P, Vigneswaran K. Fibroids and Infertility. *Current Obstetrics and Gynecology*  
486 *Reports*. 2016;5(2):81-8.
- 487 21. Abam DS, Kasso T. Uterine fibroids and pregnancy: A review of the challenges. *Obstetrics*.  
488 2017.



- 489 22. Delli Carpini G, Morini S, Papiccio M, Serri M, Damiani V, Grelloni C, et al. The  
490 association between childbirth, breastfeeding, and uterine fibroids: an observational study.  
491 *Scientific Reports*. 2019;9(1):1-8.
- 492 23. Ezeama C, Ikechebelu J, Obiechina N, Ezeama N. Clinical Presentation of Uterine Fibroids  
493 in Nnewi, Nigeria: A 5. year Review. *Annals of medical and health sciences research*.  
494 2012;2(2):114-8.
- 495 24. Lim WH, Cohen SC, Lamaro VP. Intra-abdominal haemorrhage from uterine fibroids: a  
496 systematic review of the literature. *BMC surgery*. 2020;20(1):1-7.
- 497 25. Farquhar C, Arroll B, Ekeroma A, Fentiman G, Lethaby A, Rademaker L, et al. An  
498 evidence-based guideline for the management of uterine fibroids. *Australian and New Zealand*  
499 *Journal of Obstetrics and Gynaecology*. 2001;41(2):125-44.
- 500 26. Ross RK, Pike MC, Vessey MP, Bull D, Yeates D, Casagrande JT. Risk factors for uterine  
501 fibroids: reduced risk associated with oral contraceptives. *Br Med J (Clin Res Ed)*.  
502 1986;293(6543):359-62.
- 503 27. Fraser IS, Kovacs GT. The efficacy of non-contraceptive uses for hormonal contraceptives.  
504 *Medical journal of Australia*. 2003;178(12):621-4.
- 505 28. Jones RK. *Beyond birth control: the overlooked benefits of oral contraceptive pills*: Alan  
506 Guttmacher Institute New York, NY; 2011.
- 507 29. Marsh EE, Al-Hendy A, Kappus D, Galitsky A, Stewart EA, Kerolous M. Burden,  
508 prevalence, and treatment of uterine fibroids: a survey of US women. *Journal of women's*  
509 *health*. 2018;27(11):1359-67.
- 510 30. Mara M, Kubinova K. Embolization of uterine fibroids from the point of view of the  
511 gynecologist: pros and cons. *Int J Womens Health*. 2014;6:623.
- 512 31. Ghant MS, Sengoba KS, Vogelzang R, Lawson AK, Marsh EE. An altered perception of  
513 normal: understanding causes for treatment delay in women with symptomatic uterine fibroids.  
514 *Journal of Women's Health*. 2016;25(8):846-52.
- 515 32. Nicholls C, Glover L, Pistrang N. The illness experiences of women with fibroids: an  
516 exploratory qualitative study. *Journal of Psychosomatic Obstetrics & Gynecology*. 2004;25(3-  
517 4):295-304.
- 518 33. Stewart EA, Nowak RA. Uterine fibroids: hiding in plain sight. *Physiology*. 2022;37(1):16-  
519 27.
- 520 34. Faul F, Erdfelder E, Lang A-G, Buchner A. G\* Power 3: A flexible statistical power  
521 analysis program for the social, behavioral, and biomedical sciences. *Behavior research*  
522 *methods*. 2007;39(2):175-91.
- 523 35. Cohen J. *A power primer*. 2016.
- 524 36. Morita S, Thall PF, Müller P. Determining the effective sample size of a parametric prior.  
525 *Biometrics*. 2008;64(2):595-602.
- 526 37. Gillett R. Sample size determination in a chi-squared test given information from an earlier  
527 study. *Journal of Educational and Behavioral Statistics*. 1996;21(3):230-46.
- 528 38. Greenland S. Power, sample size and smallest detectable effect determination for  
529 multivariate studies. *Statistics in Medicine*. 1985;4(2):117-27.
- 530 39. Lachin JM. Power and sample size evaluation for the Cochran–Mantel–Haenszel mean  
531 score (Wilcoxon rank sum) test and the Cochran–Armitage test for trend. *Statistics in medicine*.  
532 2011;30(25):3057-66.
- 533 40. Rana R, Singhal R. Chi-square test and its application in hypothesis testing. *Journal of*  
534 *Primary Care Specialties*. 2015;1(1):69-71.
- 535 41. Franke TM, Ho T, Christie CA. The chi-square test: Often used and more often  
536 misinterpreted. *American journal of evaluation*. 2012;33(3):448-58.
- 537 42. Hirotzu C. Beyond analysis of variance techniques: Some applications in clinical trials.  
538 *International Statistical Review/Revue Internationale de Statistique*. 1993:183-201.



- 539 43. Yuan K-H, Bentler PM. 5. Three likelihood-based methods for mean and covariance  
540 structure analysis with nonnormal missing data. *Sociological methodology*. 2000;30(1):165-  
541 200.
- 542 44. Massey Jr FJ. The Kolmogorov-Smirnov test for goodness of fit. *Journal of the American*  
543 *statistical Association*. 1951;46(253):68-78.
- 544 45. Koehler KJ, Larntz K. An empirical investigation of goodness-of-fit statistics for sparse  
545 multinomials. *Journal of the American Statistical Association*. 1980;75(370):336-44.
- 546 46. Kramer M, Schmidhammer J. The chi-squared statistic in ethology: use and misuse. *Animal*  
547 *Behaviour*. 1992;44(5):833-41.
- 548 47. Mehrotra DV, Chan IS, Berger RL. A cautionary note on exact unconditional inference for  
549 a difference between two independent binomial proportions. *Biometrics*. 2003;59(2):441-50.
- 550 48. Ludbrook J. Analysing 2× 2 contingency tables: which test is best? *Clinical and*  
551 *Experimental Pharmacology and Physiology*. 2013;40(3):177-80.
- 552 49. Upton GJ. Fisher's exact test. *Journal of the Royal Statistical Society: Series A (Statistics*  
553 *in Society)*. 1992;155(3):395-402.
- 554 50. Goodman LA. Association models and canonical correlation in the analysis of cross-  
555 classifications having ordered categories. *Journal of the American Statistical Association*.  
556 1981;76(374):320-34.
- 557 51. Shahar E, Shahar DJ. Causal diagrams and three pairs of biases. *Epidemiology—current*  
558 *perspectives on research and practice*. 2012:31-62.
- 559 52. Freedman D, Humphreys P. Are there algorithms that discover causal structure? *Synthese*.  
560 1999;121:29-54.
- 561 53. Odebode AAP. Awareness of Predisposing Factors of Uterine Fibroids Among Females In  
562 Oyo State: Implications For Social Workers. *Gender & Behaviour*. 2017;15(1):8105-16.
- 563 54. Ghant MS, Sengoba KS, Vogelzang R, Lawson AK, Marsh EE. An Altered Perception of  
564 Normal: Understanding Causes for Treatment Delay in Women with Symptomatic Uterine  
565 Fibroids. *J Womens Health (Larchmt)*. 2016;25(8):846-52.
- 566 55. Saghir S, Kamran H, Khalid S, Sohail N, Naveed M. Determinants of Uterine Fibroids  
567 Among Married Women Attending Public Hospitals in Lahore, Pakistan. *Asian Journal of*  
568 *Allied Health Sciences (AJAHS)*. 2020:33-7.
- 569 56. Borah BJ, Yao X, Laughlin-Tommaso SK, Heien HC, Stewart EA. Comparative  
570 effectiveness of uterine leiomyoma procedures using a large insurance claims database.  
571 *Obstetrics and gynecology*. 2017;130(5):1047.
- 572 57. Gao M, Wang H. Frequent milk and soybean consumption are high risks for uterine  
573 leiomyoma: A prospective cohort study. *Medicine*. 2018;97(41).
- 574 58. Otify M, Critchley HO. Pathophysiology of Uterine Fibroids. *Modern Management of*  
575 *Uterine Fibroids*. 2020:1.
- 576 59. Tinelli A, Vinciguerra M, Malvasi A, Andjić M, Babović I, Sparić R. Uterine Fibroids and  
577 Diet. *International Journal of Environmental Research and Public Health*. 2021;18(3):1066.
- 578 60. Tojjeva I, Khalimova ZY, Zufarova SA. OBESITY AND UTERINE FIBROIDS. *Art of*  
579 *Medicine International Medical Scientific Journal*. 2021;1(2).
- 580 61. Uzoma O, Ejikem E. Clinico-histopathological patterns of benign gynecological lesions at  
581 a tertiary hospital in Eastern Nigeria: a 5 year review. *International Journal of Reproduction,*  
582 *Contraception, Obstetrics and Gynecology*. 2017;6(7):2690-4.
- 583 62. Azzahra M, Gondodiputro S, Amarullah M. Three Years Data of Uterine Fibroids Patient  
584 Characteristics at West Java Top Referral Hospital. *Althea Medical Journal*. 2017;4(3):382-8.
- 585 63. Akpenpuun JR, bai-tachia M, waroh JN. Awareness, Knowledge and Perceived Attitude  
586 Towards Women Living with Fibroid in Benue State, Nigeria.

- 587 64. Ciebiera M, Ali M, Prince L, Jackson-Bey T, Atabiekov I, Zgliczyński S, et al. The evolving  
588 role of natural compounds in the medical treatment of uterine fibroids. *Journal of Clinical*  
589 *Medicine*. 2020;9(5):1479.
- 590 65. Wu B-J, Shao C-Y, Zhu Y, Huang K, Wei W, Zhang X-J, et al. Effects of menarche, parity,  
591 primiparous age, and reproductive diseases on uterine fibroids of rural women in China. 2020.
- 592 66. Arisukwu OC, Nwogu J, Asamu F. Prevalence and preventive measures for fibroid among  
593 Celibate-women in South-Western, Nigeria. *The Journal of Social Sciences Researc*.  
594 2019;5(3):2413-6670.
- 595 67. Millien C, Manzi A, Katz AM, Gilbert H, Fawzi MCS, Farmer PE, et al. Assessing burden,  
596 risk factors, and perceived impact of uterine fibroids on women's lives in rural Haiti:  
597 implications for advancing a health equity agenda, a mixed methods study. *International*  
598 *Journal for Equity in Health*. 2021;20(1):1-17.
- 599 68. Ikechebelu JI, Okpala BC, Eleje GU, Nwachukwu CE, Nwajiaku LA, Nnoruka M. Delayed  
600 presentation of giant uterine fibroids in a Nigerian private specialist health facility. *SAGE Open*  
601 *Medical Case Reports*. 2021;9:2050313X211063137.
- 602 69. Riggan KA, Stewart EA, Balls-Berry JE, Venable S, Allyse MA. Patient Recommendations  
603 for Shared Decision-Making in Uterine Fibroid Treatment Decisions. *Journal of Patient*  
604 *Experience*. 2021;8:23743735211049655.
- 605 70. Singh V, Shinde S, Shinde N. Dilemma in diagnosis of giant uterine fibroid: Case Report.  
606 *International Journal*. 2021;4(2):633.
- 607 71. Naz F, Memon S, Bai G, Habib A, Maheshwari M. Outcome of Uterine Leiomyoma in  
608 young Female Population. *Journal of The Society of Obstetricians and Gynaecologists of*  
609 *Pakistan*. 2021;11(2).
- 610 72. Swain D, Yadav C, Kumari J, Rani M, Rongmei PD, Khurana SK. Predictors and  
611 symptomatic burden of uterine fibroids among women in South-Eastern India: a cross-sectional  
612 survey analysis. *International Journal of Reproduction, Contraception, Obstetrics and*  
613 *Gynecology*. 2019;8(2):525.
- 614 73. Salas A, López J, Reyes R, Évora C, de Oca FM, Báez D, et al. Organotypic culture as a  
615 research and preclinical model to study uterine leiomyomas. *Scientific Reports*.  
616 2020;10(1):5212.
- 617 74. Tayebi N, Izaddost N, Akbarzadeh M. Relationship Between Android Obesity and  
618 Menstrual Disorders in Different Ages of the Menarche. *Crescent Journal of Medical and*  
619 *Biological Sciences*. 2020;7(4):568-72.
- 620 75. Sangeetha N, Sivakumar K, Arulmani A, Kannan A, Choudhary AK. Menstrual problems  
621 among adolescent schoolgirls in East Delhi, India. 2021.
- 622 76. Chiumente M, De Rosa M, Messori A, Proli EM. Burden of uterine fibroids in Italy:  
623 epidemiology, treatment outcomes, and consumption of health care resources in more than  
624 5,000 women. *ClinicoEconomics and outcomes research: CEOR*. 2017;9:525.
- 625 77. Laughlin-Tommaso SK, Lu D, Thomas L, Diamond MP, Wallace K, Wegienka G, et al.  
626 Short-term quality of life after myomectomy for uterine fibroids from the COMPARE-UF  
627 Fibroid Registry. *American journal of obstetrics and gynecology*. 2020;222(4):345. e1-. e22.
- 628 78. Allred H, Pyrak C. Are uterine leiomyomas a risk factor for spontaneous abortion?  
629 *Evidence-Based Practice*. 2020;23(12):37-8.
- 630 79. Harmon QE. The burden of uterine fibroids: a search for primary and secondary prevention.  
631 *Fertility and sterility*. 2019;111(1):50-1.
- 632 80. Soliman AM, Margolis MK, Castelli-Haley J, Fuldeore MJ, Owens CD, Coyne KS. Impact  
633 of uterine fibroid symptoms on health-related quality of life of US women: evidence from a  
634 cross-sectional survey. *Current medical research and opinion*. 2017;33(11):1971-8.
- 635 81. Egbe TO, Badjang TG, Tchounzou R, Egbe E-N, Ngowe MN. Uterine fibroids in  
636 pregnancy: prevalence, clinical presentation, associated factors and outcomes at the Limbe and

- 637 Buea Regional Hospitals, Cameroon: a cross-sectional study. BMC Research Notes.  
638 2018;11(1):889.
- 639 82. Tran AP, Al Naber J, Tambor ES, Myers ER. Addressing heterogenous outcomes in uterine  
640 fibroid research: a call to action. American journal of obstetrics and gynecology.  
641 2020;223(1):75. e1-. e5.
- 642 83. Fortin C, Flyckt R, Falcone T. Alternatives to hysterectomy: the burden of fibroids and the  
643 quality of life. Best Practice & Research Clinical Obstetrics & Gynaecology. 2018;46:31-42.
- 644
